# Supplementary material for: Gab2 (Grb2-Associated Binder2) Plays a Crucial Role in Inflammatory Signaling and Endothelial Dysfunction
Source: PubMed Central journal article supplement — Arterioscler Thromb Vasc Biol. 2021 Apr 8;41(6):1987–2005. doi: 10.1161/ATVBAHA.121.316153 (PMC8147699; doi:10.1161/atvbaha.121.316153), 2021-04-08

SUPPLEMENTAL MATERIALS

# Gab2 Plays a Crucial Role in inflammatory Signaling and Endothelial Dysfunction

Vijay Kondreddy, Jhansi Magisetty, Shiva Keshava, L. Vijaya Mohan Rao,\* and Usha R. Pendurthi\*

Department of Cellular and Molecular Biology, The University of Texas Health Science Center at Tyler, TX

\*Address to correspond:

Usha R. Pendurthi or

L. Vijaya Mohan Rao

<sup>1</sup>Department of Cellular and Molecular Biology

The University of Texas Health Science Center at Tyler

11937 U.S. Highway 271

Tyler

Texas 75708

Phone: 903-877-7332/7342

Fax: 903-877-7426

e-mail: [Usha.Pendurthi@uthct.edu](mailto:Usha.Pendurthi@uthct.edu)

[Vijay.Rao@uthct.edu](mailto:Vijay.Rao@uthct.edu)

## Major Resources Table

### Genetically Modified Animals

|                        | Species | Vendor or Source                           | Background Strain                                                                                               | Other Information | Persistent ID / URL                                                               |
|------------------------|---------|--------------------------------------------|-----------------------------------------------------------------------------------------------------------------|-------------------|-----------------------------------------------------------------------------------|
| <b>Parent - Male</b>   | Mice    | The Jackson Laboratory<br>Bar Harbor<br>ME | B6.129S4- <i>Gab2</i> <sup>tm1Hhg</sup> /Mmjax<br>MMRRC Stock<br>No: 32101-<br>JAX   <i>Gab2</i> <sup>-/+</sup> | #<br>MMRRC032101  | <a href="https://www.jax.org/strain/012590">https://www.jax.org/strain/012590</a> |
| <b>Parent - Female</b> | Mice    | The Jackson Laboratory<br>Bar Harbor<br>ME | B6.129S4- <i>Gab2</i> <sup>tm1Hhg</sup> /Mmjax<br>MMRRC Stock<br>No: 32101-<br>JAX   <i>Gab2</i> <sup>-/+</sup> | #<br>MMRRC032101  | <a href="https://www.jax.org/strain/012590">https://www.jax.org/strain/012590</a> |

### Antibodies

| Target antigen            | Vendor or Source          | Catalog # | Working concentration | Lot # (preferred but not required) | Persistent ID / URL                                                                                                                                                                                                                                                                                                                                                                             |
|---------------------------|---------------------------|-----------|-----------------------|------------------------------------|-------------------------------------------------------------------------------------------------------------------------------------------------------------------------------------------------------------------------------------------------------------------------------------------------------------------------------------------------------------------------------------------------|
| anti-human VCAM1 antibody | Cell Signaling Technology | 13662     | 5µg/ml                |                                    | <a href="https://www.cellsignal.com/products/primary-antibodies/vcam-1-e1e8x-rabbit-mab/13662?Ntk=Products&amp;Ntt=13662">https://www.cellsignal.com/products/primary-antibodies/vcam-1-e1e8x-rabbit-mab/13662?Ntk=Products&amp;Ntt=13662</a>                                                                                                                                                   |
| Anti-ICAM1 antibody       | Santa Cruz Biotechnology  | Sc-8439   | 1ug/ml                |                                    | <a href="https://www.scbt.com/p/icam-1-antibody-g-5">https://www.scbt.com/p/icam-1-antibody-g-5</a>                                                                                                                                                                                                                                                                                             |
| Gab1 antibody             | Santa Cruz Biotechnology  | Sc-133191 | 1ug/ml                | J2516                              | <a href="https://www.scbt.com/p/gab-1-antibody-h-7">https://www.scbt.com/p/gab-1-antibody-h-7</a>                                                                                                                                                                                                                                                                                               |
| Gab2 antibody             | Santa Cruz Biotechnology  | sc-365590 | 2ug/ml                | A3017                              | <a href="https://www.scbt.com/p/gab-2-antibody-h-6">https://www.scbt.com/p/gab-2-antibody-h-6</a>                                                                                                                                                                                                                                                                                               |
| Gab2 rabbit antibody      | Sigma-Aldrich             | HPA001368 | 2ug/ml                |                                    | <a href="https://www.sigmaaldrich.com/catalog/product/sigma/hpa001368?lang=en&amp;region=US&amp;gclid=Cj0KCQjw28T8BRDbARIsAEOMBcwoiSm2Gvn--IPKMLQVaBUmZj3WsOL6KIYxmK61z8IYkPLrwoZDd4aAshCEALw_wcB">https://www.sigmaaldrich.com/catalog/product/sigma/hpa001368?lang=en&amp;region=US&amp;gclid=Cj0KCQjw28T8BRDbARIsAEOMBcwoiSm2Gvn--IPKMLQVaBUmZj3WsOL6KIYxmK61z8IYkPLrwoZDd4aAshCEALw_wcB</a> |

|                                     |                           |       |                                                          |                    |                                                                                                                                                                                                                                                                             |
|-------------------------------------|---------------------------|-------|----------------------------------------------------------|--------------------|-----------------------------------------------------------------------------------------------------------------------------------------------------------------------------------------------------------------------------------------------------------------------------|
|                                     |                           |       |                                                          |                    |                                                                                                                                                                                                                                                                             |
| p-NF-Kb antibody                    | Cell Signaling Technology | 3033  | Concentration not specified by CST. Used 1;1000 dilution | -                  | <a href="https://www.cellsignal.com/products/primary-antibodies/phospho-nf-kb-p65-ser536-93h1-rabbit-mab/3033?Ntk=Products&amp;Ntt=3033">https://www.cellsignal.com/products/primary-antibodies/phospho-nf-kb-p65-ser536-93h1-rabbit-mab/3033?Ntk=Products&amp;Ntt=3033</a> |
| p-ERK1/2 antibody                   | Cell Signaling Technology | 4370S | Concentration not specified by CST. Used 1;1000 dilution | Lot17 Ref 01/2018  | <a href="https://media.cellsignal.com/pdf/4370.pdf">https://media.cellsignal.com/pdf/4370.pdf</a>                                                                                                                                                                           |
| p-Akt (S473) antibody               | Cell Signaling Technology | 9271S | Concentration not specified by CST. Used 1;1000 dilution | -                  | <a href="https://www.cellsignal.com/products/primary-antibodies/phospho-akt-ser473-antibody/9271">https://www.cellsignal.com/products/primary-antibodies/phospho-akt-ser473-antibody/9271</a>                                                                               |
| ERK antibody                        | Cell Signaling Technology | 9102S | Concentration not specified by CST. Used 1;1000 dilution | -                  | <a href="https://www.cellsignal.com/products/primary-antibodies/p44-42-mapk-erk1-2-antibody/9102">https://www.cellsignal.com/products/primary-antibodies/p44-42-mapk-erk1-2-antibody/9102</a>                                                                               |
| Akt antibody                        | Cell Signaling Technology | 9272  | Concentration not specified by CST. Used 1;1000 dilution | Lot22 Ref; 06/2010 | <a href="https://www.cellsignal.com/products/primary-antibodies/akt-antibody/9272">https://www.cellsignal.com/products/primary-antibodies/akt-antibody/9272</a>                                                                                                             |
| p-SAPK/JNK (Thr183/Tyr185) antibody | Cell Signaling Technology | 9251  | Concentration not specified by CST. Used 1;1000 dilution |                    | <a href="https://www.cellsignal.com/products/primary-antibodies/phospho-sapk-jnk-thr183-tyr185-antibody/9251?Ntk=Products&amp;Ntt=9251">https://www.cellsignal.com/products/primary-antibodies/phospho-sapk-jnk-thr183-tyr185-antibody/9251?Ntk=Products&amp;Ntt=9251</a>   |

|                                           |                           |            |                                                          |   |                                                                                                                                                                                                                                                                                         |
|-------------------------------------------|---------------------------|------------|----------------------------------------------------------|---|-----------------------------------------------------------------------------------------------------------------------------------------------------------------------------------------------------------------------------------------------------------------------------------------|
| p-p38-MAPK (Thr180/Tyr182) antibody       | Cell Signaling Technology | 4631       | Concentration not specified by CST. Used 1;1000 dilution |   | <a href="https://www.cellsignal.com/products/primary-antibodies/phospho-p38-mapk-thr180-tyr182-12f8-rabbit-mab/4631?Ntk=Products&amp;Ntt=4631">https://www.cellsignal.com/products/primary-antibodies/phospho-p38-mapk-thr180-tyr182-12f8-rabbit-mab/4631?Ntk=Products&amp;Ntt=4631</a> |
| GAPDH antibody                            | Santa cruz Biotechnology  | sc-365062  | 5ug/ml                                                   | - | <a href="https://www.scbt.com/p/gapdh-antibody-g-9">https://www.scbt.com/p/gapdh-antibody-g-9</a>                                                                                                                                                                                       |
| Ly-6G antibody                            | BioLegend                 | 127602     | 5ug/ml                                                   | - | <a href="https://www.biolegend.com/fr-fr/search-results/purified-anti-mouse-ly-6g-antibody-4767">https://www.biolegend.com/fr-fr/search-results/purified-anti-mouse-ly-6g-antibody-4767</a>                                                                                             |
| MPO antibody                              | R&D systems               | AF3667     | 5ug/ml                                                   | - | <a href="https://www.rndsystems.com/products/human-mouse-myeloperoxidase-mpo-antibody_af3667">https://www.rndsystems.com/products/human-mouse-myeloperoxidase-mpo-antibody_af3667</a>                                                                                                   |
| Histone H3 (Cit-Arg17, Arg2-Arg8)antibody | Novus Biologicals         | NB10057135 | 5ug/ml                                                   |   | <a href="https://www.novusbio.com/products/histone-h3-antibody_nb100-57135">https://www.novusbio.com/products/histone-h3-antibody_nb100-57135</a>                                                                                                                                       |

#### DNA/cDNA Clones

| Clone Name          | Sequence | Source / Repository                   | Persistent ID / URL |
|---------------------|----------|---------------------------------------|---------------------|
| pMSCV-GAB2-IRES-GFP |          | Benjamin Neel, NYU School of medicine |                     |
| pUMVC               |          | AddGene, MA                           |                     |
| VSVG                |          | AddGene, MA                           |                     |

#### Cultured Cells

| Name   | Vendor or Source | Sex (F, M, or unknown) | Persistent ID / URL                                                                                                                                                                                                                                                                                                                     |
|--------|------------------|------------------------|-----------------------------------------------------------------------------------------------------------------------------------------------------------------------------------------------------------------------------------------------------------------------------------------------------------------------------------------|
| HUVECs | Lonza            | Unknown -pooled        | <a href="https://bioscience.lonza.com/lonza_bs/US/en/Primary-and-Stem-Cells/p/000000000000184943/HUVEC-%E2%80%93-Human-Umbilical-Vein-Endothelial-Cells%2C-Pooled%2C-">https://bioscience.lonza.com/lonza_bs/US/en/Primary-and-Stem-Cells/p/000000000000184943/HUVEC-%E2%80%93-Human-Umbilical-Vein-Endothelial-Cells%2C-Pooled%2C-</a> |
|        |                  |                        |                                                                                                                                                                                                                                                                                                                                         |
|        |                  |                        |                                                                                                                                                                                                                                                                                                                                         |

#### Data & Code Availability

| Description | Source / Repository | Persistent ID / URL |
|-------------|---------------------|---------------------|
|-------------|---------------------|---------------------|

|  |  |  |
|--|--|--|
|  |  |  |
|  |  |  |
|  |  |  |

### Other

| Description                                  | Source / Repository | Persistent ID / URL |
|----------------------------------------------|---------------------|---------------------|
| Gab1 siRNA (5'-AAUACUACGAGUGUGUUAACU -3')    | Sigma               | -                   |
| Gab2 siRNA (5'-UUUAAGGCACACAUUCAGGGC -3')    | Sigma               |                     |
| c-Src: siRNA 5'-CGGCTCCAGATTGTCAACAACACAG-3' | Sigma               |                     |
| Fyn: siRNA 5'-GAGCGACAGCTATTGTCCTTTGGAA-3'   | Sigma               |                     |
| Yes: siRNA 5'-CAGGTGGTGTTACTATATTTG-3'       | Sigma               |                     |

## Reagents

TNF $\alpha$ , IL-1 $\beta$ , and ELISA kit for human MCP-1 were purchased from R&D Systems (Minneapolis, MN). LPS (*E. Coli* O111:B4) and Gab2 polyclonal antibodies were from Sigma Aldrich (St. Louis, MO). Phospho-specific or total antibodies against ERK, JNK, TAK1, p38 MAPK, c-jun, p65, Akt, TRAF2, RIP1, and VCAM1 were obtained from Cell Signaling Technology (Danvers, MA). Monoclonal antibodies against Gab2, ubiquitin, phospho-tyrosine, SHP2, PLC $\gamma$ 2, P85 $\alpha$ , ICAM1, Cav1, c-Src, Fyn, Yes, and TNFR1 were procured from Santa Cruz Biotechnology (Dallas, TX). ELISA kits for mouse TNF $\alpha$ , IL-1 $\beta$ , IL-6, MCP1, and human IL-8 were purchased from Invitrogen (Carlsbad, CA). Ly-6G antibody was from BioLegend (San Diego, CA). Fibrin antibody was purchased from EMD Millipore, MA, USA.

## Silencing of Gab1, Gab2, c-Src, Fyn, or Yes

HUVEC were transfected with siRNA specific for Gab1, Gab2, c-Src, Fyn, or Yes using Lipofectamine RNAiMAX reagent (Invitrogen). The siRNA sequence for Gab1: AAUACUACGAGUGUGUUAACU, Gab2: UUUAAGGCACACAUUCAGGGC, Fyn: GAGCGACAGCTATTGTCCTTTGGAA, c-Src: CGGCTCCAGATTGTCAACAACACAG, Yes: CAGGTGGTGTACTATATTTG. In controls, HUVEC were transfected with scrambled oligonucleotides of the above sequences. Briefly, when endothelial cell monolayers reached 70% confluency, they were washed once with serum-free medium, and then incubated with 200 nM of specific siRNA or a scrambled siRNA in Lipofectamine RNAiMAX reagent in serum-free medium. Eight hours post-transfection, the medium was changed to the growth medium (EBM-2 medium containing 2% FBS and growth supplements). The transfected cells were cultured for 48 h before they were used in experiments.

## Plasmids, retrovirus, and RT-PCR

A retroviral construct expressing Gab2 (pMSCV-GAB2-IRES-GFP) was a gift of Benjamin Neel (NYU School of Medicine). To produce Gab2 retrovirus, 293 T17 cells ( $8 \times 10^6$ ) were co-transfected with the retroviral plasmid (4  $\mu$ g) together with two packaging plasmids, pUMVC (3  $\mu$ g), and VSVG (1  $\mu$ g; Addgene, MA) using FuGENE HD (24  $\mu$ l, Promega, WI). Control retrovirus (CV, pMSCV-IRES-GFP) was produced using the same procedure. Retrovirus harvested from cell supernatants 48 h post-transfection were filtered through 0.45  $\mu$ m low protein-binding sterile filter.

HUVEC cells were infected with Gab2 or control retrovirus including polybrene (8  $\mu$ g/ml; Sigma) during the infection. Experiments were conducted after 48 h of infection. In experiments involving the use of inhibitors of PI3K, SHP2, or TAK1, they were added to cells 1 h before stimulation of cells with agonists. At the end of the treatment period, the supernatant was removed, and the cells were solubilized in RNAzol. The total RNA was extracted, and cDNA was prepared by reverse transcription (iScript cDNA Synthesis Kit, Bio-Rad) and processed for qRT-PCR analysis (ABI PRISM 7000 Real-Time PCR System). The results were expressed as a relative expression or fold-increase over control.

**Supplementary figure I. Gab2 deficiency suppresses LPS-induced cytokine expression in peritoneal macrophages (PM $\phi$ ).** Peritoneal macrophages were isolated from Gab2<sup>-/-</sup> and WT littermate control mice and treated with LPS (2  $\mu$ g/ml) for 15 h. MCP-1 (A) and IL-6 (B) levels in the supernatants were measured in ELISA. \*, p < 0.05; \*\*, p < 0.01

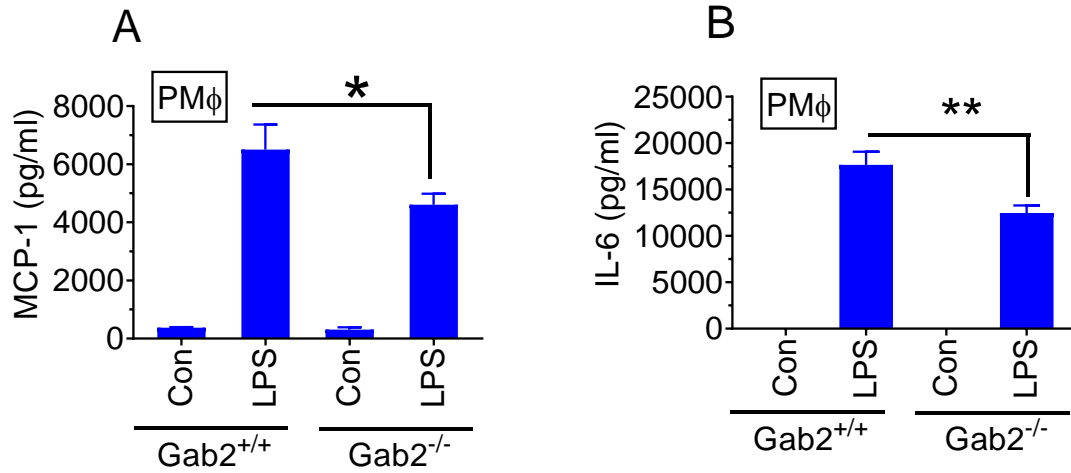

**Supplementary Figure II. Gab2 deficiency attenuates TNF $\alpha$ -induced neutrophil infiltration and increased MCP-1 expression.** Gab2<sup>-/-</sup> and WT littermate mice were injected with TNF $\alpha$  (50  $\mu$ g/kg b.w) intravenously via the tail vein. Four h following TNF $\alpha$  injection, the mice were euthanized, the lung tissues were collected and processed for immunohistochemistry and measuring cytokines. **(A)** The lung tissue sections were stained with a Ly-6G antibody for neutrophil infiltration. **Left**, Representative images of tissue sections stained with LY-6G. **Right**, Count of LY-6G–stained cells/field. **(B)** MCP-1 levels in the lung tissue extracts.

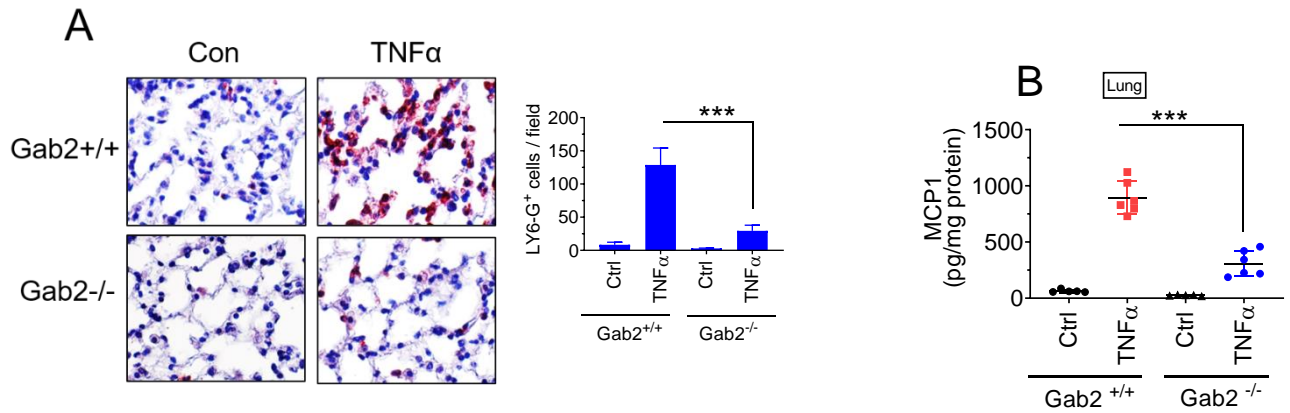



**Supplementary Figure III: Uncropped immunoblot images that correspond to cropped images shown in various figures as indicated in parenthesis) of the main manuscript. (A) Gab1, (B) Gab2, (C) GAPDH (Figure 1A); (D) ICAM1, (E) VCAM1 (Figure 1B); (F) TF (tissue factor) (Figure 1E); (G) p-ERK1/2, (H) p-p38, (I) t-ERK1/2 and t-p38, (J) p-JNK1/2 (Figure 3A); (K) p-p65 and p-c-jun, (L) p-Akt (Figure 3B); (M) Gab2 immunoprecipitation, (N) Gab2 tyrosine-phosphorylation (Figure 4A); (O) SHP2 (Figure 2A); (P) c-Src, (Q) Fyn, and (R) Yes (Figure 4D); (S, T) p-TAK1 (Figure 5A); (U) poly-Ub-TAK1 (Figure 5E).**

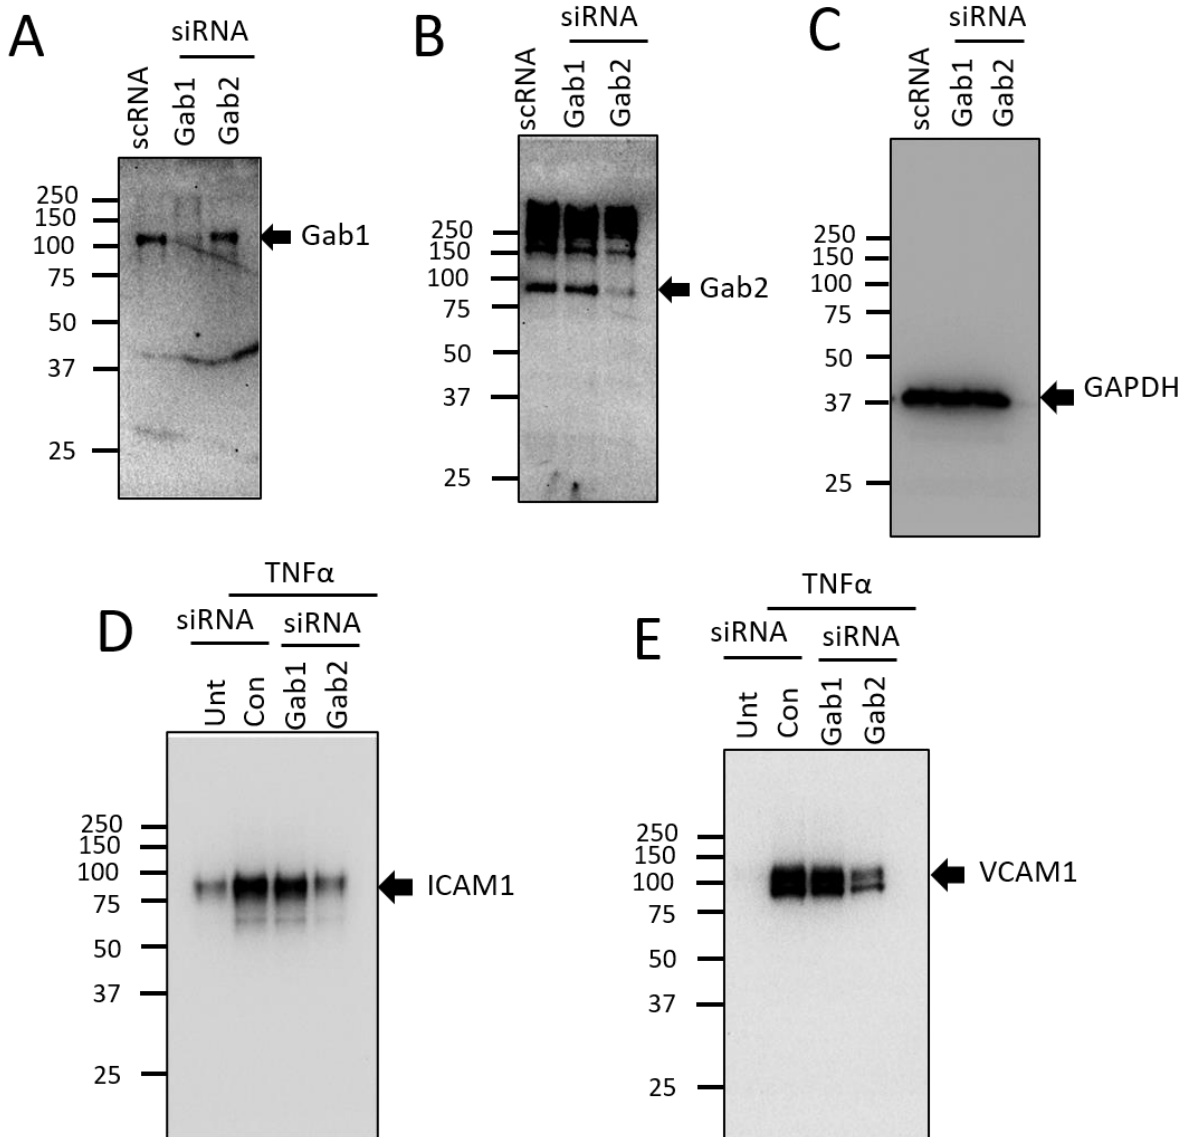

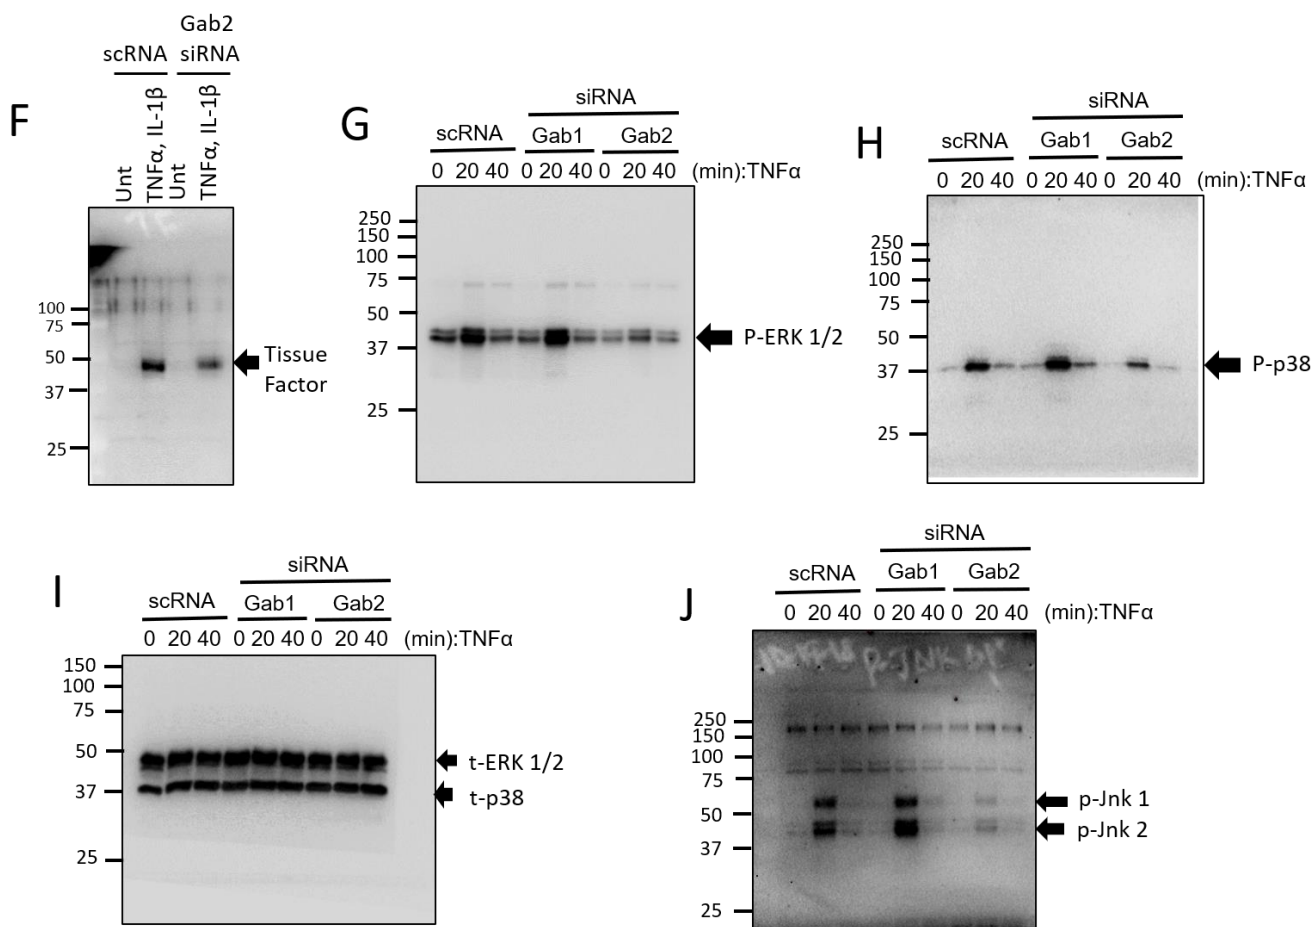

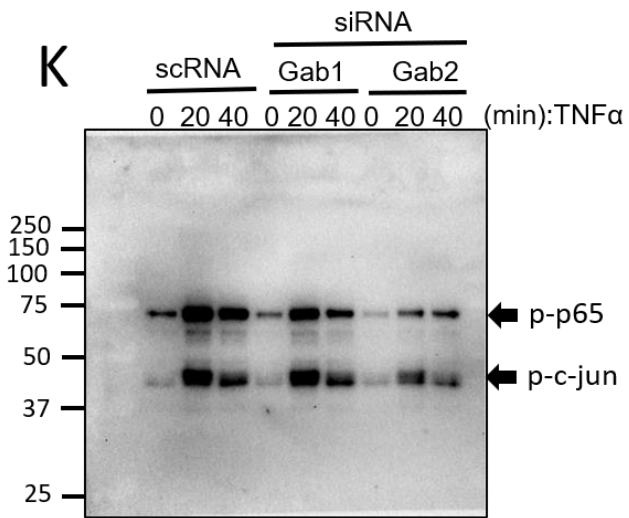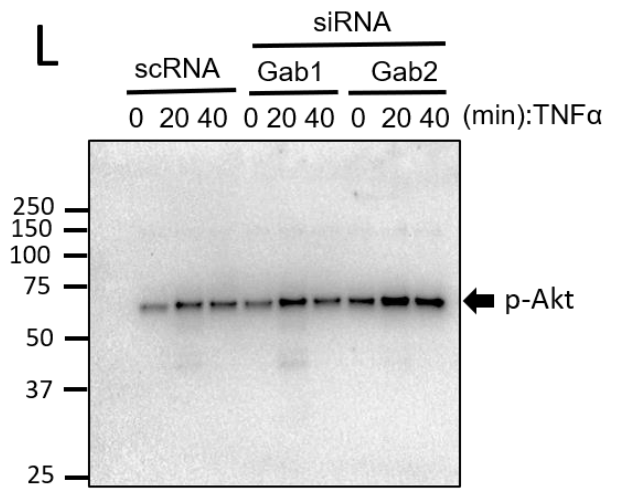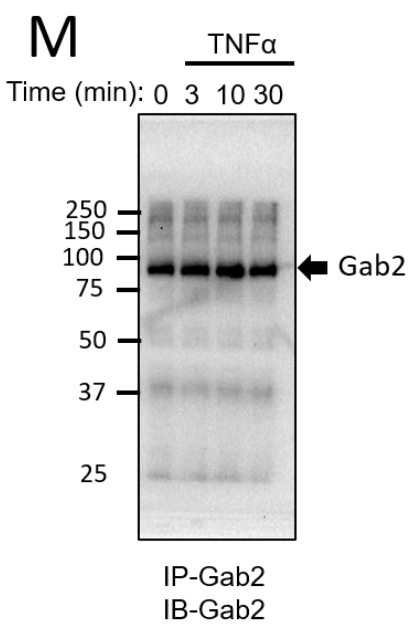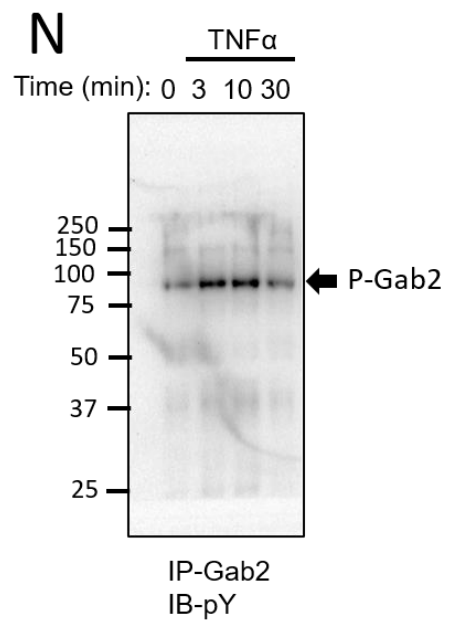

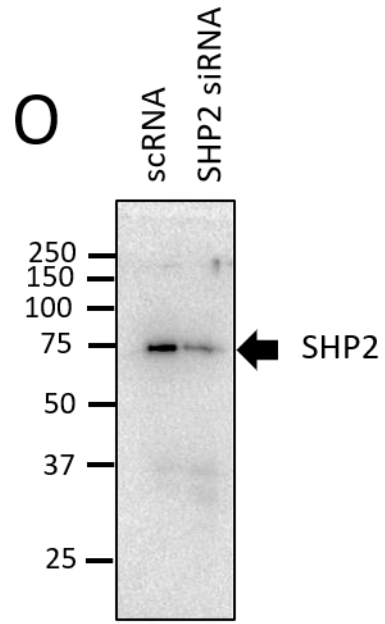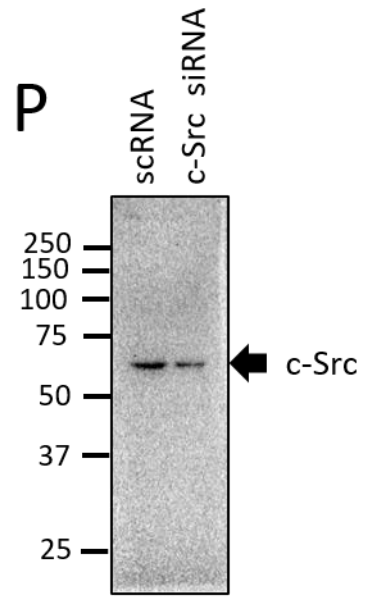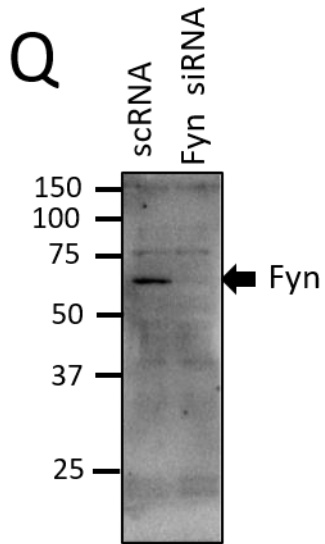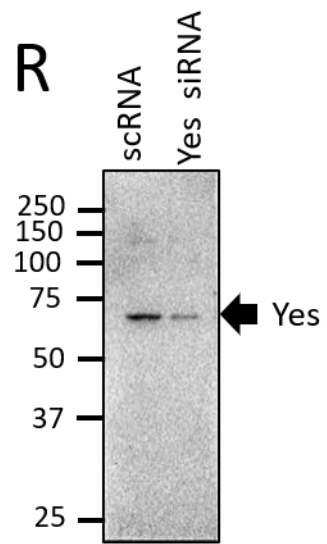

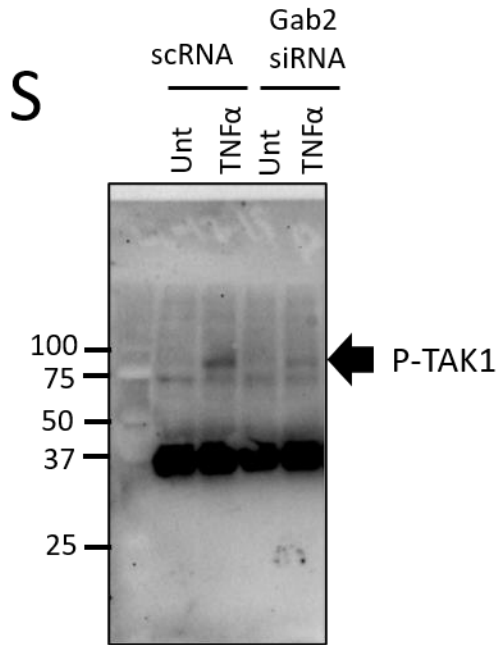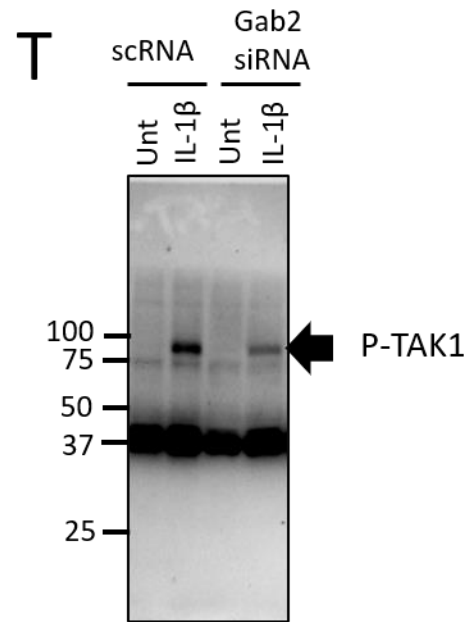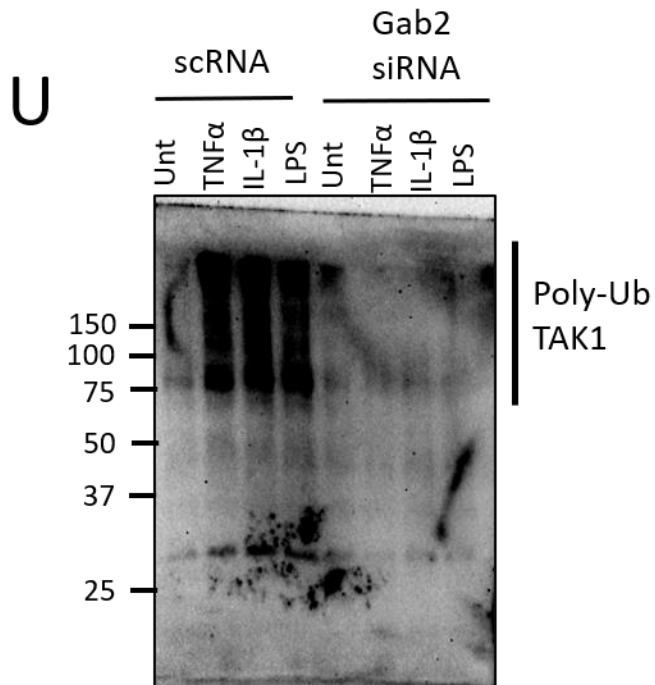

Supplement: atv-41-1987-s001.pdf [file atv-41-1987-s001.pdf]
